# Supplementary material for: Recent significant decline of strong carbon peat accumulation rates in tropical Andes related to climate change and glacier retreat
Source: Copernicus journal article supplement (doi:10.5194/bg-2022-47), 2022-02-21
Supplement: Supplementary file 1 [file bg-2022-47-supplement.pdf]

## Recent significant decline of strong carbon peat accumulation rates in tropical Andes related to climate change and glacier retreat

Romina Llanos, Patricia Moreira-Turcq, Bruno Turcq, Raúl Espinoza Villar, Yizet Huaman, Thomas Condom, Bram Willems

Correspondence to: Romina Llanos (rominallanos@outlook.com)

**Table S1: Average and standard deviation values of bulk density ( $\text{g cm}^{-3}$ ), organic matter (%), organic carbon (%), carbon stable isotope  $\delta^{13}\text{C}$  (‰) and carbon accumulation rates ( $\text{gC m}^{-2} \text{yr}^{-1}$ ) for the four peat cores.**

| Peatlands<br>Cores                                                  | APA 1             |                   | APA 2             |                   |
|---------------------------------------------------------------------|-------------------|-------------------|-------------------|-------------------|
|                                                                     | APA1-C1           | APA1-C5           | APA2-C3           | APA2-C4           |
| <b>Bulk Density</b><br>( $\text{g cm}^{-3}$ )                       | $0.088 \pm 0.034$ | $0.132 \pm 0.055$ | $0.075 \pm 0.025$ | $0.078 \pm 0.024$ |
| <b>Organic Matter</b><br>(%)                                        | $96.5 \pm 1.2$    | $96.0 \pm 1.3$    | $92.7 \pm 2.8$    | $90.8 \pm 3.0$    |
| <b>Organic Carbon</b><br>(%)                                        | $51.1 \pm 0.6$    | $50.9 \pm 0.7$    | $49.1 \pm 1.5$    | $48.1 \pm 1.6$    |
| <b><math>\delta^{13}\text{C}</math></b><br>(‰)                      |                   | $-25.40 \pm 0.69$ |                   | $-25.36 \pm 0.69$ |
| <b>C Accumulation Rate</b><br>( $\text{gC m}^{-2} \text{yr}^{-1}$ ) | $400.1 \pm 206.2$ | $546.7 \pm 264.5$ | $239.0 \pm 100.2$ | $193.6 \pm 53.0$  |

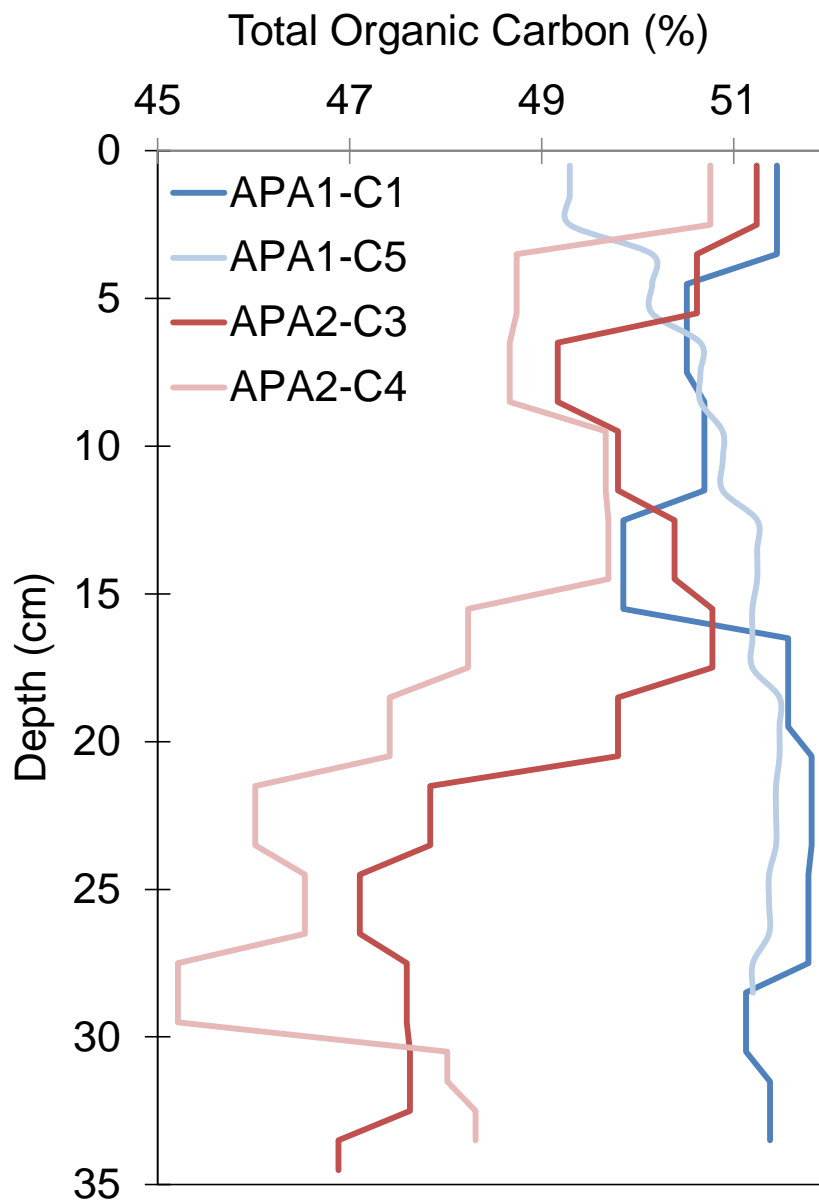

**Figure S1: Total organic carbon (TOC, %) contents for the four peat cores: APA1-C5 and APA2-C4 at 4200 m asl, and APA2-C3 and APA2-C4 at 4420 m asl.**
