# Supplementary material for: Recent significant decline of strong carbon peat accumulation rates in tropical Andes related to climate change and glacier retreat
Source: Copernicus journal article supplement (doi:10.5194/bg-2022-47), 2022-02-21
Supplement: Supplementary file [file bg-2022-47-AC1-supplement.pdf]

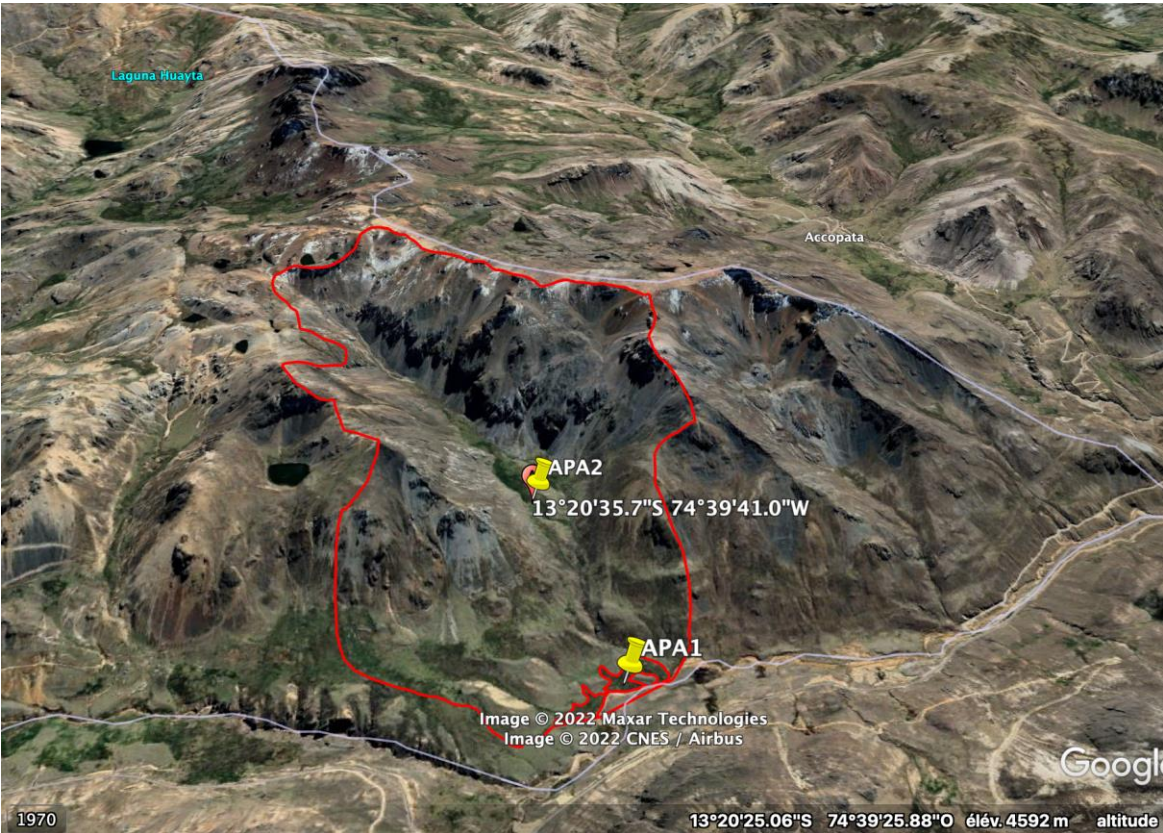

Figure RC1.1: The sub-catchment area of APA1.

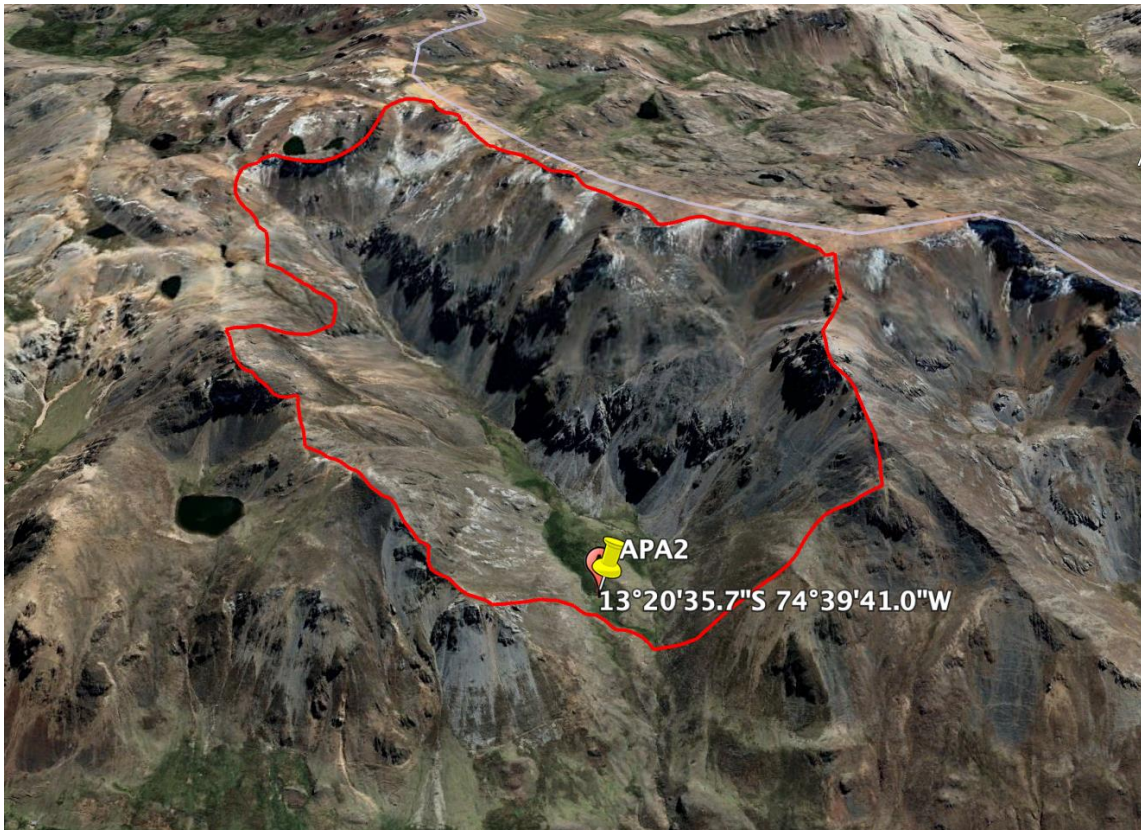

Figure RC1.2: The sub-catchment area of APA2.

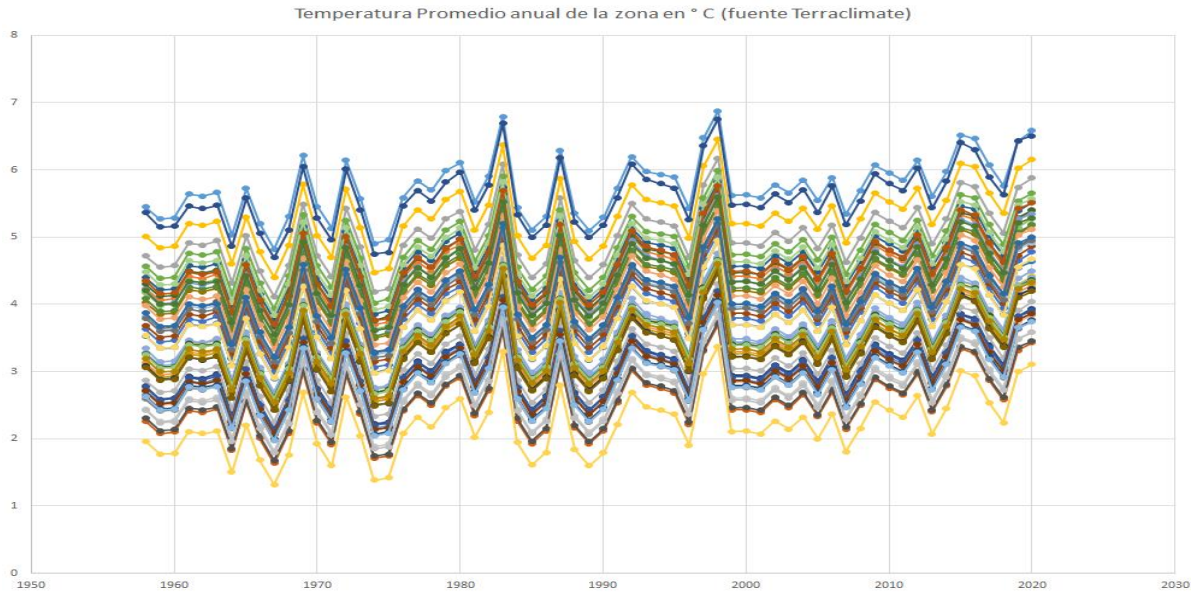

Figure RC1.3: Mean annual temperature (°C) over the period 1958-2020 of the pixels of TerraClimate datasets covering the two sub-catchments.

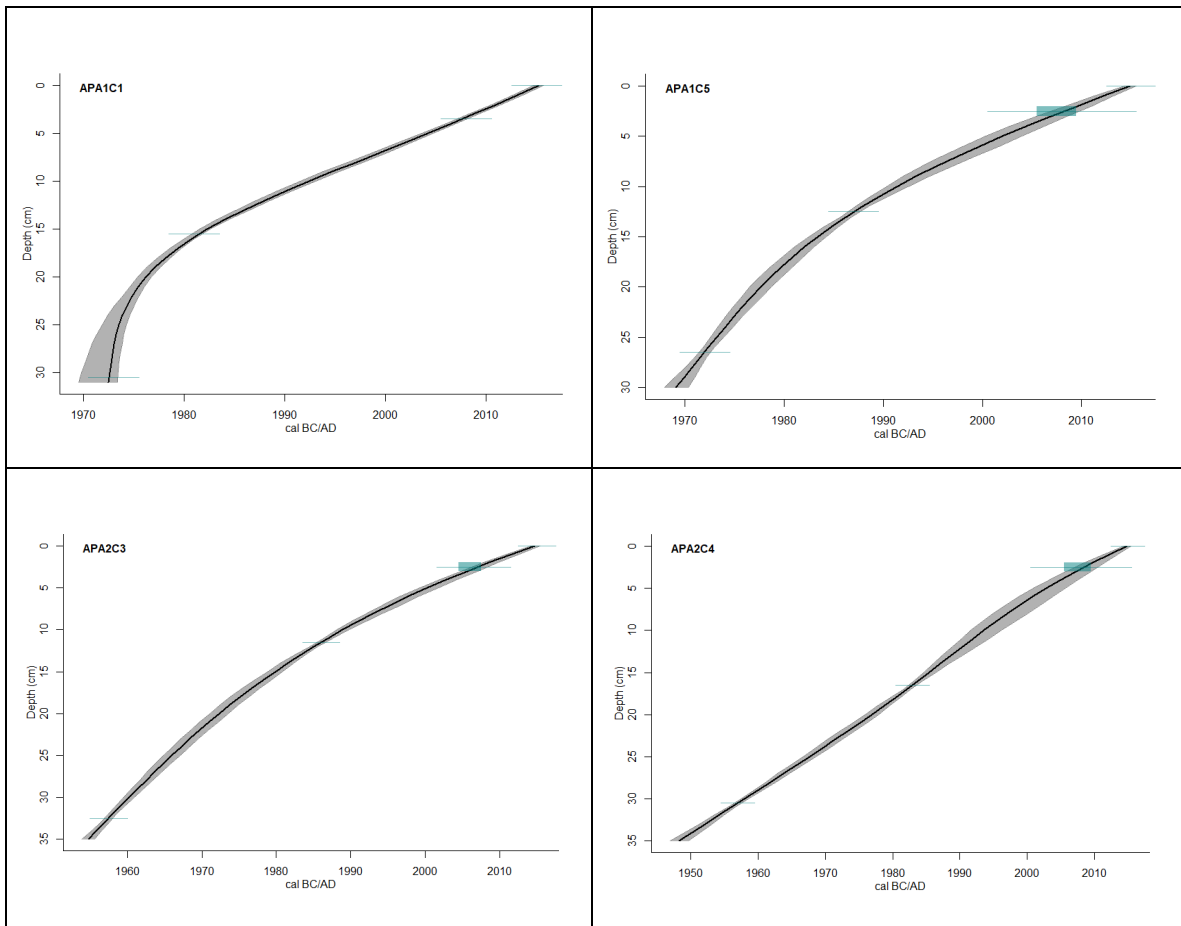

Figure RC1.4: New age models.
